**S2 Table. The numbers of subjects within each group reporting each related adverse event<sup>1</sup>**

| Adverse events                                 | Route        | Aerosol<br>Day 0 | Intradermal<br>Day 28 | Intradermal<br>Day 0  | Aerosol<br>Day 28    | Intradermal<br>Day 0 | Intradermal<br>Day 28 |
|------------------------------------------------|--------------|------------------|-----------------------|-----------------------|----------------------|----------------------|-----------------------|
|                                                | <b>Group</b> | <b>1</b>         | <b>1</b>              | <b>2</b>              | <b>2</b>             | <b>3</b>             | <b>3</b>              |
|                                                | <b>N</b>     | <b>12</b>        | <b>12</b>             | <b>13<sup>2</sup></b> | <b>9<sup>3</sup></b> | <b>12</b>            | <b>12</b>             |
| <b>Solicited respiratory AEs</b>               |              |                  |                       |                       |                      |                      |                       |
| Chest pain                                     |              | 1 (8%)           | 0                     | 0                     | 5 (56%)              | 0                    | 0                     |
| Haemoptysis                                    |              | 0                | 0                     | 0                     | 0                    | 0                    | 0                     |
| Coughing phlegm                                |              | 0                | 0                     | 2 (15%)               | 3 (33%)              | 3 (25%)              | 0                     |
| Shortness of breath                            |              | 2 (17%)          | 0                     | 1 (8%)                | 4 (44%)              | 1 (8%)               | 0                     |
| Wheeze                                         |              | 0                | 0                     | 0                     | 2 (22%)              | 2 (17%)              | 0                     |
| Sore throat                                    |              | 2 (17%)          | 2 (17%)               | 3 (23%)               | 2 (22%)              | 3 (25%)              | 5 (42%)               |
| Cough                                          |              | 4 (33%)          | 2 (17%)               | 4 (31%)               | 7 (78%)              | 4 (33%)              | 5 (42%)               |
| <b>Unsolicited respiratory AEs<sup>4</sup></b> |              |                  |                       |                       |                      |                      |                       |
| Nasal congestion                               |              | 1 (8%)           | 0                     | 0                     | 0                    | 0                    | 0                     |
| Rhinorrhoea                                    |              | 0                | 0                     | 1(8%)                 | 0                    | 1 (8%)               | 1 (8%)                |
| Face feeling swollen                           |              | 0                | 0                     | 0                     | 1 (11%)              | 0                    | 0                     |
| Chest discomfort                               |              | 0                | 0                     | 0                     | 1 (11%)              | 0                    | 0                     |

---

**Solicited systemic AEs**

|                  |         |         |         |         |         |         |
|------------------|---------|---------|---------|---------|---------|---------|
| Malaise          | 3 (25%) | 2 (17%) | 4 (31%) | 7 (78%) | 1 (8%)  | 2 (17%) |
| Nausea           | 1 (8%)  | 1 (8%)  | 0       | 5 (56%) | 1 (8%)  | 1 (8%)  |
| Fatigue          | 5 (42%) | 6 (50%) | 3 (23%) | 7 (78%) | 5 (42%) | 4 (33%) |
| Headache         | 5 (42%) | 5 (42%) | 6 (46%) | 8 (89%) | 4 (33%) | 4 (33%) |
| Arthralgia       | 3 (25%) | 2 (17%) | 2 (15%) | 4 (44%) | 4 (33%) | 1 (8%)  |
| Myalgia          | 5 (42%) | 6 (50%) | 5 (38%) | 7 (78%) | 6 (50%) | 4 (33%) |
| Felt feverish    | 2 (17%) | 2 (17%) | 3 (23%) | 7 (78%) | 3 (25%) | 3 (25%) |
| Documented fever | 2 (17%) | 0       | 1 (8%)  | 6 (67%) | 1 (8%)  | 0       |

**Unsolicited systemic AEs<sup>4</sup>**

|                   |        |        |         |         |        |        |
|-------------------|--------|--------|---------|---------|--------|--------|
| Neck or Back pain | 0      | 1 (8%) | 0       | 1 (11%) | 0      | 0      |
| Chills            | 1 (8%) | 0      | 0       | 0       | 0      | 0      |
| Presyncope        | 0      | 0      | 2 (15%) | 2 (22%) | 0      | 0      |
| Syncope           | 0      | 1(8%)  | 0       | 0       | 0      | 0      |
| Insomnia          | 0      | 0      | 0       | 0       | 1 (8%) | 0      |
| Muscle spasm      | 0      | 0      | 0       | 0       | 0      | 1 (8%) |

---

| <b>Solicited local AEs</b>               |   |           |           |         |           |           |
|------------------------------------------|---|-----------|-----------|---------|-----------|-----------|
| Local erythema                           | - | 12 (100%) | 13 (100%) | -       | 12 (100%) | 12 (100%) |
| Local swelling                           | - | 12 (100%) | 13 (100%) | -       | 12 (100%) | 12 (100%) |
| Local scaling                            | - | 12 (100%) | 13 (100%) | -       | 12 (100%) | 8 (67%)   |
| Local pain                               | - | 11 (92%)  | 12 (92%)  | -       | 11 (92%)  | 4 (100%)  |
| Local pruritus                           | - | 10 (83%)  | 12 (92%)  | -       | 11 (92%)  | 9 (75%)   |
| Local warmth                             | - | 11 (92%)  | 12 (92%)  | -       | 9 (75%)   | 8 (67%)   |
| <b>Unsolicited local AEs<sup>4</sup></b> |   |           |           |         |           |           |
| Axillary pain                            | - | 0         | 2 (15%)   | -       | 2 (17%)   | 1 (8%)    |
| Lymphadenopathy                          | - | 0         | 2 (15%)   | -       | 0         | 1 (8%)    |
| <b>Laboratory AEs<sup>5</sup></b>        |   |           |           |         |           |           |
| Anaemia                                  | 0 | 0         | 1 (11%)   | 0       | 0         | 0         |
| Lymphopaenia                             | 0 | 0         | 0         | 1 (11%) | 0         | 0         |
| Neutropaenia                             | 0 | 0         | 0         | 1 (11%) | 0         | 0         |

<sup>1</sup> All related adverse event data. Respiratory and solicited adverse event data shown for the first 7 days following each vaccination, as AEs following bronchoscopy at Day 7 were not deemed to be related. All adverse event data at the injection site and laboratory parameters data for 1 month period following each vaccination were deemed to be related.

<sup>2</sup> 3 placebo controls excluded from analysis

<sup>3</sup> Includes one subject who withdrew post first vaccination but prior to boost vaccination so was replaced

<sup>4</sup> Unsolicited symptoms are those deemed possibly, probably or definitely related to the vaccine

<sup>5</sup> All laboratory AEs were a maximum of Grade 1 severity
