**S3 Table. Systemic adverse events (AEs) by group, by vaccination and by severity**

| Number of participants per group               |                      | Group 1<br>12                        | Group 2<br>13*                            | Group 3<br>12                            | Total AEs                             |                                          |                                           |                   |
|------------------------------------------------|----------------------|--------------------------------------|-------------------------------------------|------------------------------------------|---------------------------------------|------------------------------------------|-------------------------------------------|-------------------|
| <b>Systemic AEs by group</b>                   |                      |                                      |                                           |                                          |                                       |                                          |                                           |                   |
| <b>Total possible systemic AEs<sup>#</sup></b> |                      | <b>192</b>                           | <b>176</b>                                | <b>192</b>                               | <b>560</b>                            |                                          |                                           |                   |
| <b>Severity</b>                                | Mild                 | 35                                   | 43                                        | 42                                       | 120                                   |                                          |                                           |                   |
|                                                | Moderate             | 10                                   | 17                                        | 2                                        | 29                                    |                                          |                                           |                   |
|                                                | Severe               | 5                                    | 15                                        | 0                                        | 20                                    |                                          |                                           |                   |
| <b>Total</b>                                   | <b>n (frequency)</b> | <b>50 (0.26)</b>                     | <b>75 (0.43)</b>                          | <b>44 (0.23)</b>                         | <b>169 (0.30)</b>                     |                                          |                                           |                   |
| <b>Systemic AEs by route</b>                   |                      |                                      |                                           |                                          |                                       |                                          |                                           |                   |
|                                                |                      | <b>Group 1<br/>Day 0<br/>Aerosol</b> | <b>Group 1<br/>Day 28<br/>Intradermal</b> | <b>Group 2<br/>Day 0<br/>Intradermal</b> | <b>Group 2<br/>Day 28<br/>Aerosol</b> | <b>Group 3<br/>Day 0<br/>Intradermal</b> | <b>Group 3<br/>Day 28<br/>Intradermal</b> | <b>Total</b>      |
| <b>Total possible systemic AEs</b>             |                      | <b>96</b>                            | <b>96</b>                                 | <b>104</b>                               | <b>72</b>                             | <b>96</b>                                | <b>96</b>                                 |                   |
|                                                | Mild                 | 18                                   | 17                                        | 22                                       | 21                                    | 24                                       | 18                                        |                   |
|                                                | Moderate             | 5                                    | 5                                         | 2                                        | 15                                    | 1                                        | 1                                         |                   |
|                                                | Severe               | 3                                    | 2                                         | 0                                        | 15                                    | 0                                        | 0                                         |                   |
| <b>Total</b>                                   | <b>n (frequency)</b> | <b>26 (0.27)</b>                     | <b>24 (0.25)</b>                          | <b>24 (0.23)</b>                         | <b>51 (0.71)</b>                      | <b>25 (0.26)</b>                         | <b>19 (0.20)</b>                          | <b>169 (0.30)</b> |

\*Includes one subject who withdrew post first vaccination but prior to boost vaccination so was replaced. The last three enrolled subjects received placebo not MVA85A boost following safety concerns

<sup>#</sup> Maximum of 8 solicited systemic adverse events per subject. Total possible adverse events calculated as follows. Group 1: 12 subjects x 8 solicited adverse events x 2 vaccinations= 192; Group 2: (13 subjects x 8 solicited adverse events received 1st vaccination) + (9 subjects x 8 solicited adverse events received 2nd vaccination) = 176; Group 3: 12 subjects x 8 solicited adverse events x 2 vaccinations= 192
