**S6 Table. Solicited adverse events by volunteer, by group**

| <b>Adverse events by individual</b> | <b>Group</b> | <b>1</b>  | <b>2</b> | <b>3</b>  | <b>P value</b>                                        |
|-------------------------------------|--------------|-----------|----------|-----------|-------------------------------------------------------|
|                                     | N            | 12        | 9*       | 12        |                                                       |
| <b>Solicited respiratory AEs</b>    |              |           |          |           |                                                       |
| Median AEs per volunteer<br>(Range) |              | 0.5 (0-4) | 2 (0-7)  | 2 (0-5)   | 0.12 (not significant)                                |
| <b>Solicited systemic AEs</b>       |              |           |          |           |                                                       |
| Median AEs per volunteer<br>(Range) |              | 4 (0-10)  | 8 (0-13) | 2 (0-12)  | 0.07 (not significant)                                |
| <b>Solicited local AEs</b>          |              |           |          |           |                                                       |
| Median AEs per volunteer<br>(Range) |              | 7 (4-8)   | 7 (6-10) | 10 (7-12) | Grp 1 vs Grp 3: p= 0.0001<br>Grp 2 vs Grp 3: p= 0.014 |

---

\*3 placebo controls excluded from analysis
