**S7 Table. ELISpot responses statistical analysis: AUC.**

| <b>Ag85A</b>   |                |                                                          |
|----------------|----------------|----------------------------------------------------------|
| <b>Groups</b>  | <b>P-value</b> | <b>95% CI (SFC per <math>1 \times 10^6</math> PBMCs)</b> |
| 1 vs 2         | 0.808          | -30996 to 44597                                          |
| 2 vs 3         | 0.917          | -35469 to 35518                                          |
| 1 vs 3         | 0.713          | -23551 to 39739                                          |
| <b>MVA-CD4</b> |                |                                                          |
| <b>Groups</b>  | <b>P-value</b> | <b>95% CI</b>                                            |
| 1 vs 2         | 0.754          | -10283 to 6377                                           |
| 2 vs 3         | 0.382          | -18757 to 1922                                           |
| 1 vs 3         | 0.114          | -389 to 10510                                            |
| <b>MVA-CD8</b> |                |                                                          |
| <b>Groups</b>  | <b>P-value</b> | <b>95% CI</b>                                            |
| 1 vs 2         | 0.702          | -24041 to 45602                                          |
| 2 vs 3         | 0.464          | -9506 to 39652                                           |
| 1 vs 3         | 0.291          | -10886 to 50309                                          |
