**S10 Table. Whole blood intracellular cytokines statistical analysis: Area Under the Curve (AUC). MVA Mann-Whitney test (AUC medians)**

| <b>CD4 IFN<math>\gamma</math></b> |                |                 |
|-----------------------------------|----------------|-----------------|
| <b>Groups</b>                     | <b>P-value</b> | <b>95% CI</b>   |
| 1 vs 2                            | 0.3186         | -0.6062 - 7.496 |
| 2 vs 3                            | 0.9333         | -5.67 - 3.093   |
| 1 vs 3                            | 0.1639         | -0.264 - 3.536  |
| <b>CD8 IFN<math>\gamma</math></b> |                |                 |
| 1 vs 2                            | 0.2188         | -8.2 - 13.08    |
| 2 vs 3                            | 0.0118         | -22.12 - -2.306 |
| 1 vs 3                            | 0.6011         | -15.82 - 1.864  |
| <b>CD4 TNF<math>\alpha</math></b> |                |                 |
| 1 vs 2                            | 0.6016         | -4.797 - 31.08  |
| 2 vs 3                            | 0.433          | -30.98 - 4.658  |
| 1 vs 3                            | 0.7987         | -4.871 - 6.541  |
| <b>CD8 TNF<math>\alpha</math></b> |                |                 |
| 1 vs 2                            | 0.3443         | -22.58 - 8.807  |
| 2 vs 3                            | 0.6871         | -10.37 - 13.25  |
| 1 vs 3                            | 0.4428         | -22.53 - 5.09   |
