**S11 Table. Ag85A- and MVA-specific serum IgA response for Groups 1, 2 and 3**

**Group 1**

| 85A   |       |       |       |       |       |       | MVA   |       |       |       |       |       |       |
|-------|-------|-------|-------|-------|-------|-------|-------|-------|-------|-------|-------|-------|-------|
| Day   | Day   | Day   | Day   | Day   | Day   | Day   | Day   | Day   | Day   | Day   | Day   | Day   | Day   |
| 0     | 7     | 14    | 28    | 35    | 42    | 168   | 0     | 7     | 14    | 28    | 35    | 42    | 168   |
| 0.060 | 0.052 | 0.063 | 0.051 | 0.057 | 0.031 | 0.040 | 0.214 | 0.220 | 0.166 | 0.138 | 0.530 | 1.517 | 0.225 |
| 0.057 | 0.038 | 0.042 | 0.034 | 0.044 | 0.029 | 0.030 | 1.154 | 1.189 | 1.243 | 1.318 | 1.605 | 1.525 | 0.839 |
| 0.024 | 0.041 | 0.041 | 0.055 | 0.057 | 0.053 | 0.048 | 0.188 | 0.157 | 0.127 | 0.129 | 0.192 | 0.999 | 0.425 |
| 0.057 | 0.072 | 0.059 | 0.072 | 0.074 | 0.066 | 0.053 | 0.156 | 0.147 | 0.151 | 0.155 | 0.391 | 0.546 | 0.160 |
| 0.087 | 0.046 | 0.038 | 0.036 | 0.053 | 0.056 | 0.044 | 0.120 | 0.102 | 0.118 | 0.103 | 1.695 | 0.898 | 0.213 |
| 0.014 | 0.016 | 0.030 | 0.018 | 0.033 | 0.019 | 0.045 | 0.241 | 0.218 | 0.228 | 0.222 | 0.650 | 1.692 | 0.760 |
| 0.000 | 0.006 | 0.015 | 0.010 | 0.010 | 0.011 | 0.019 | 0.031 | 0.034 | 0.034 | 0.028 | 0.050 | 0.065 | 0.045 |
| 0.035 | 0.032 | 0.027 | 0.043 | 0.063 | 0.051 | 0.028 | 0.063 | 0.091 | 0.071 | 0.067 | 0.136 | 0.397 | 0.156 |
| 0.031 | 0.028 | 0.028 | 0.027 | 0.038 | 0.031 | 0.030 | 0.444 | 0.441 | 0.396 | 0.396 | 1.284 | 0.969 | 0.455 |
| 0.061 | 0.062 | 0.053 | 0.053 | 0.059 | 0.068 | 0.046 | 0.316 | 0.265 | 0.275 | 0.280 | 0.497 | 0.857 | 0.247 |
| 0.082 | 0.066 | 0.072 | 0.067 | 0.131 | 0.082 | 0.069 | 0.134 | 0.123 | 0.143 | 0.130 | 0.256 | 0.730 | 0.324 |
| 0.108 | 0.075 | 0.078 | 0.097 | 0.107 | 0.095 | 0.091 | 0.227 | 0.210 | 0.200 | 0.236 | 0.453 | 0.766 | 0.248 |

**Group 2**

| 85A      |          |           |           |           |           |            | MVA      |          |           |           |           |           |            |
|----------|----------|-----------|-----------|-----------|-----------|------------|----------|----------|-----------|-----------|-----------|-----------|------------|
| Day<br>0 | Day<br>7 | Day<br>14 | Day<br>28 | Day<br>35 | Day<br>42 | Day<br>168 | Day<br>0 | Day<br>7 | Day<br>14 | Day<br>28 | Day<br>35 | Day<br>42 | Day<br>168 |
| 0.053    | 0.045    | 0.051     | 0.052     | 0.053     | 0.041     | 0.043      | 0.130    | 0.234    | 1.044     | 0.459     | 0.355     | 0.668     | 0.819      |
| 0.053    | 0.061    | 0.060     | 0.062     | 0.073     | 0.060     | 0.068      | 0.230    | 0.488    | 0.920     | 0.226     | 0.219     | 0.265     | 0.306      |
| 0.052    | 0.048    | 0.057     | 0.045     | 0.042     | 0.042     | 0.046      | 0.105    | 0.585    | 0.645     | 0.160     | 0.153     | 0.142     | 0.142      |
| 0.033    | 0.030    | 0.022     | 0.026     | 0.039     | 0.056     | 0.053      | 0.193    | 0.247    | 0.502     | 0.175     | 0.151     | 0.365     | 0.358      |
| 0.506    | 0.392    | 0.374     | 0.355     | 0.450     | 0.449     | 1.026      | 0.123    | 0.328    | 0.691     | 0.303     | 0.277     | 0.340     | 0.678      |
| 0.096    | 0.105    | 0.092     | 0.090     | 0.128     | 0.107     | 0.105      | 0.133    | 0.187    | 0.613     | 0.259     | 0.206     | 0.269     | 0.194      |
| 0.086    | 0.092    | 0.173     | 0.122     | 0.120     | 0.114     | 0.116      | 0.245    | 0.398    | 1.461     | 0.555     | 0.527     | 0.369     | 0.322      |
| 0.109    | 0.128    | 0.159     | 0.158     | 0.145     | 0.145     | 0.127      | 0.224    | 0.414    | 0.882     | 0.506     | 0.549     | 0.560     | 0.438      |
| 0.023    | 0.037    | 0.034     | 0.036     | 0.039     | 0.041     | 0.026      | 0.080    | 0.116    | 0.576     | 0.233     | 0.205     | 0.205     | 0.158      |

**Group 3**

| 85A      |          |           |           |           |           |            | MVA      |          |           |           |           |           |            |
|----------|----------|-----------|-----------|-----------|-----------|------------|----------|----------|-----------|-----------|-----------|-----------|------------|
| Day<br>0 | Day<br>7 | Day<br>14 | Day<br>28 | Day<br>35 | Day<br>42 | Day<br>168 | Day<br>0 | Day<br>7 | Day<br>14 | Day<br>28 | Day<br>35 | Day<br>42 | Day<br>168 |
| 0.045    | 0.037    | 0.026     | 0.024     | 0.032     | 0.036     | 0.033      | 0.070    | 0.263    | 0.906     | 0.374     | 0.393     | 0.278     | 0.333      |
| 0.085    | 0.086    | 0.092     | 0.098     | 0.131     | 0.092     | 0.096      | 0.447    | 0.469    | 0.926     | 0.594     | 0.540     | 0.419     | 0.387      |
| 0.133    | 0.129    | 0.136     | 0.121     | 0.145     | 0.122     | 0.166      | 0.162    | 0.245    | 0.347     | 0.169     | 0.168     | 0.151     | 0.231      |
| 0.015    | 0.027    | 0.031     | 0.035     | 0.040     | 0.035     | 0.076      | 0.078    | 0.244    | 1.185     | 0.494     | 0.437     | 0.500     | 0.207      |
| 0.049    | 0.027    | 0.049     | 0.071     | 0.065     | 0.074     | 0.040      | 0.507    | 0.540    | 1.584     | 0.704     | 0.641     | 0.727     | 0.703      |
| 0.084    | 0.096    | 0.092     | 0.091     | 0.098     | 0.089     | 0.065      | 0.263    | 0.379    | 0.716     | 0.250     | 0.283     | 0.258     | 0.266      |
| 0.091    | 0.114    | 0.149     | 0.096     | 0.080     | 0.056     | 0.042      | 0.165    | 0.483    | 1.176     | 0.459     | 0.431     | 0.282     | 0.245      |
| 0.028    | 0.024    | 0.032     | 0.028     | 0.042     | 0.040     | 0.039      | 0.065    | 0.225    | 0.869     | 0.350     | 0.334     | 0.334     | 0.297      |
| 0.069    | 0.046    | 0.053     | 0.044     | 0.047     | 0.051     | 0.051      | 0.216    | 0.343    | 1.241     | 0.525     | 0.501     | 0.418     | 0.372      |
| 0.039    | 0.052    | 0.048     | 0.049     | 0.060     | 0.055     | 0.051      | 0.293    | 0.421    | 2.295     | 0.709     | 0.805     | 0.752     | 0.440      |
| 0.133    | 0.155    | 0.120     | 0.119     | 0.136     | 0.123     | 0.136      | 0.403    | 0.467    | 1.563     | 0.788     | 0.913     | 0.753     | 0.404      |
| 0.116    | 0.078    | 0.064     | 0.067     | 0.063     | 0.073     | 0.073      | 0.301    | 0.517    | 0.844     | 0.557     | 0.678     | 0.749     | 0.467      |
